# Supplementary material for: Influence of charge status on the stress safety properties of Li(Ni1/3Co1/3Mn1/3)O2cells
Source: Royal Society of Chemistry journal article supplement (doi:10.1039/c6ra08774d), 2016-01-01
Supplement: c6ra08774d1.pdf [file c6ra08774d1.pdf]

## 1 Supplementary information

2 In order to investigate the stress changes of the Li anode of the test cell during galvanostatic  
3 charge/discharge cycles, the stresses of the fresh cells were real-time monitored under the same  
4 testing conditions with NMC cathode. Li metal is installed in the pristine cathode shell whose  
5 surface is smooth and the NMC electrode in the pristine anode shell whose surface is rough because  
6 the strain gauge cannot be well adhered to the rough surface for strain tests. From the testing results  
7 in Figure S1, the stress curves at the potential platform from 2.8 to 4.3 V have no obvious changes,  
8 close to the minimum detection limit of the strain gauge, indicating the stress change from lithium  
9 anode is low during cycles.

10

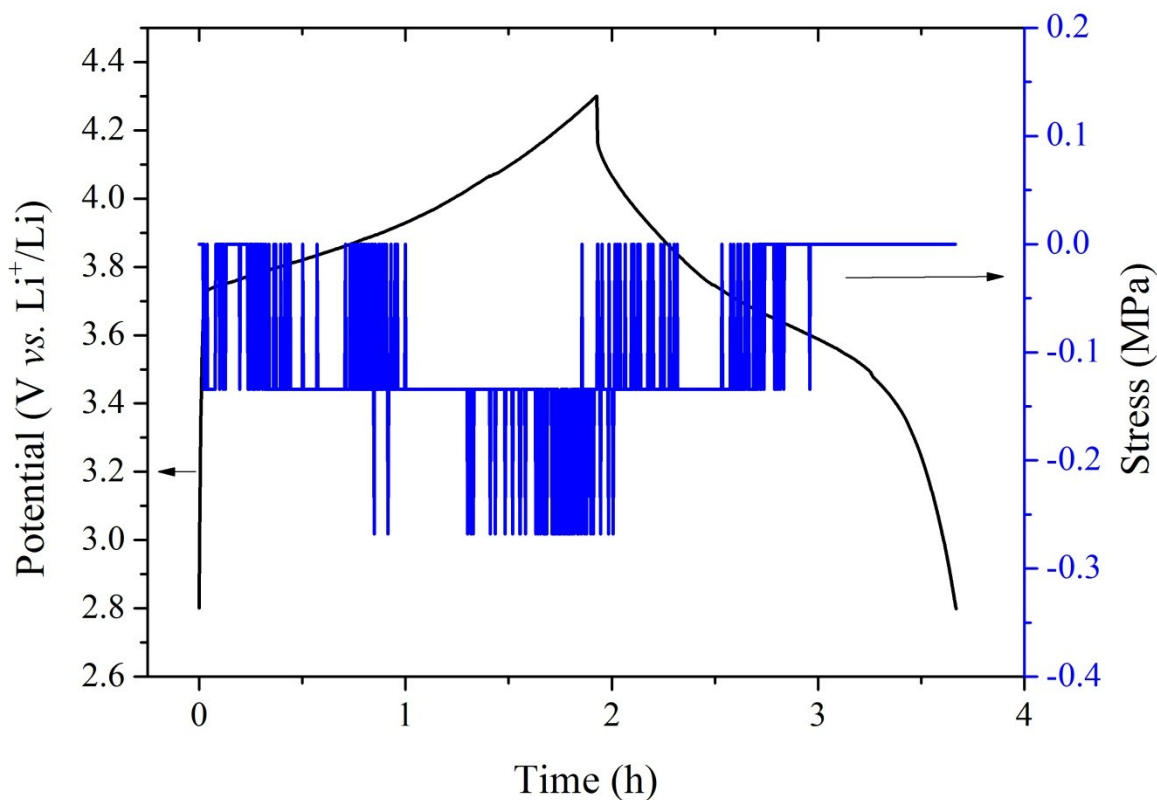

11

12 Figure S1. Galvanostatic charge/discharge curves and the corresponding strain-stress curves.

13

14 According to the structure of a full battery, strain gauges can be utilized to monitor its strain and  
15 stress changes. A commercial full battery for electric vehicles was chosen for the tests, and some  
16 pictures of the stress testing system are supplied in Figure S2. The process for adhering strain  
17 gauges is as follows: the plastic shell of the full battery was cleaned firstly by ethanol, and then  
18 dried and coated by glue. Two strain gauges were carefully pasted to the clean surface with glue,  
19 and one of them was for temperature compensation. The well-adhered strain gauges were connected  
20 to a 5210 stress-strain testing equipment.

21

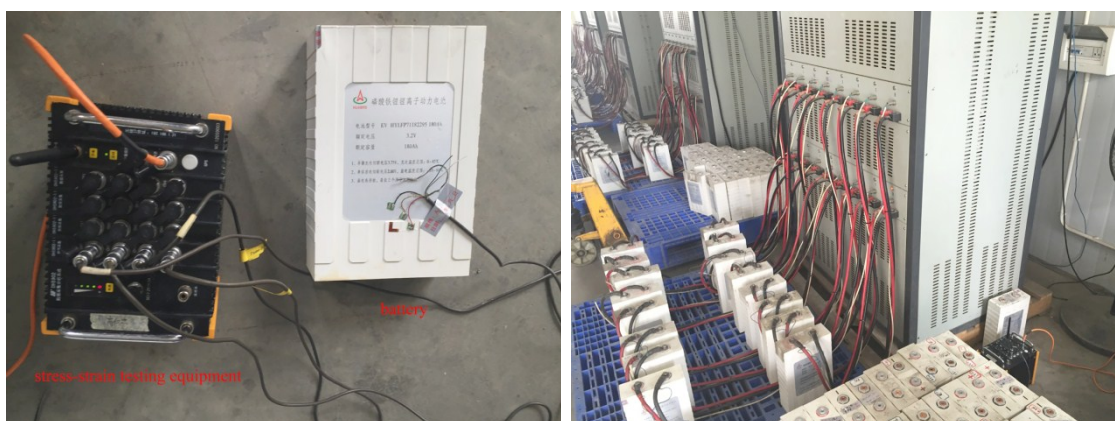

22

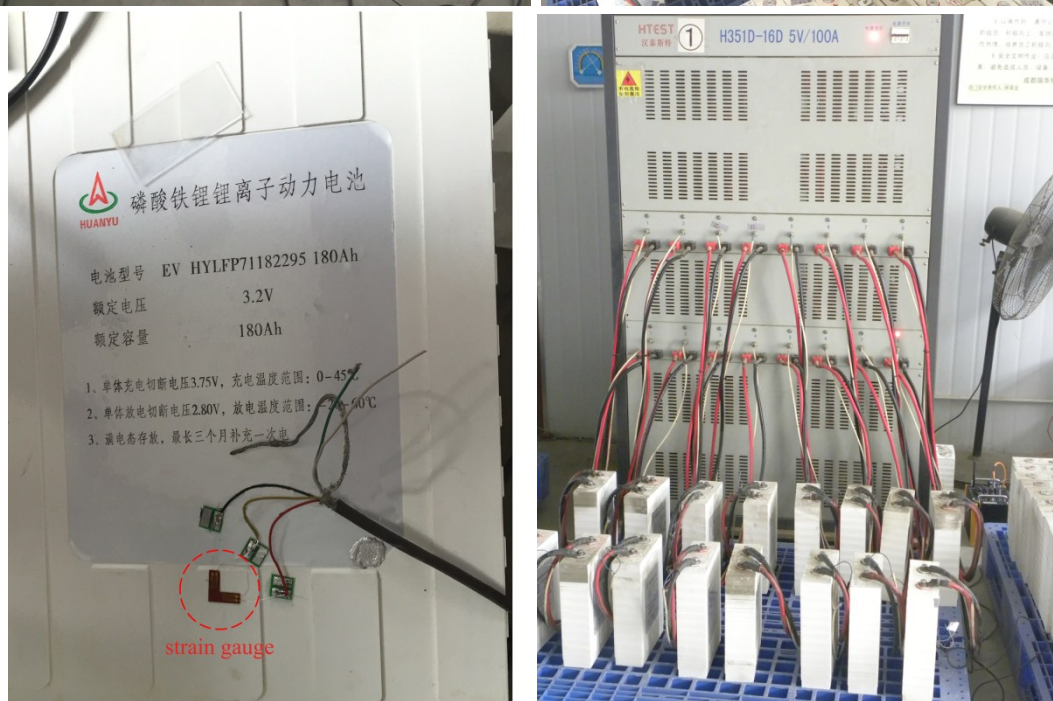

23

24 Figure S2. Some pictures of the stress testing system for a commercial full battery.
